# Supplementary material for: p90RSK pathway inhibition synergizes with cisplatin in TMEM16A overexpressing head and neck cancer
Source: PubMed Central journal article supplement (PMC10875868; doi:10.1186/s12885-024-11892-9), 2024-02-19

# Figure 2B Uncropped Western Blots

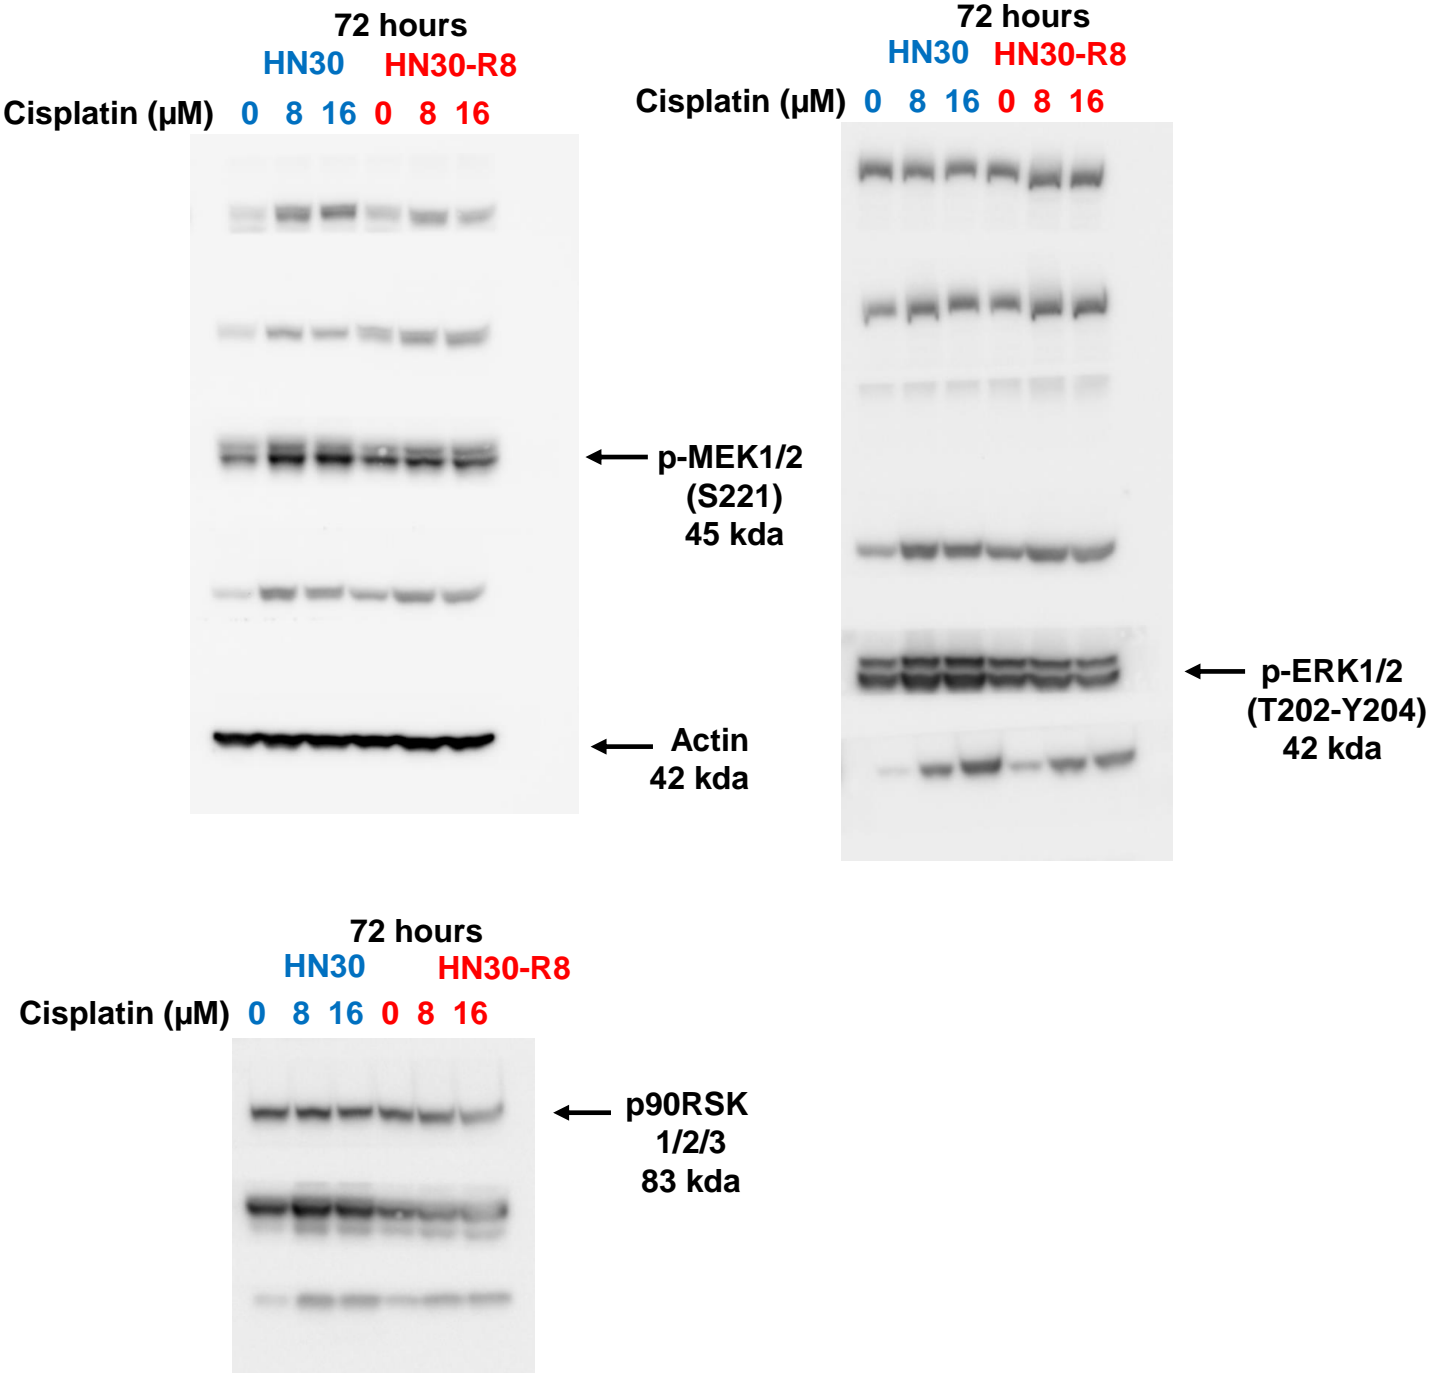

# Figure 2B Uncropped Western Blots

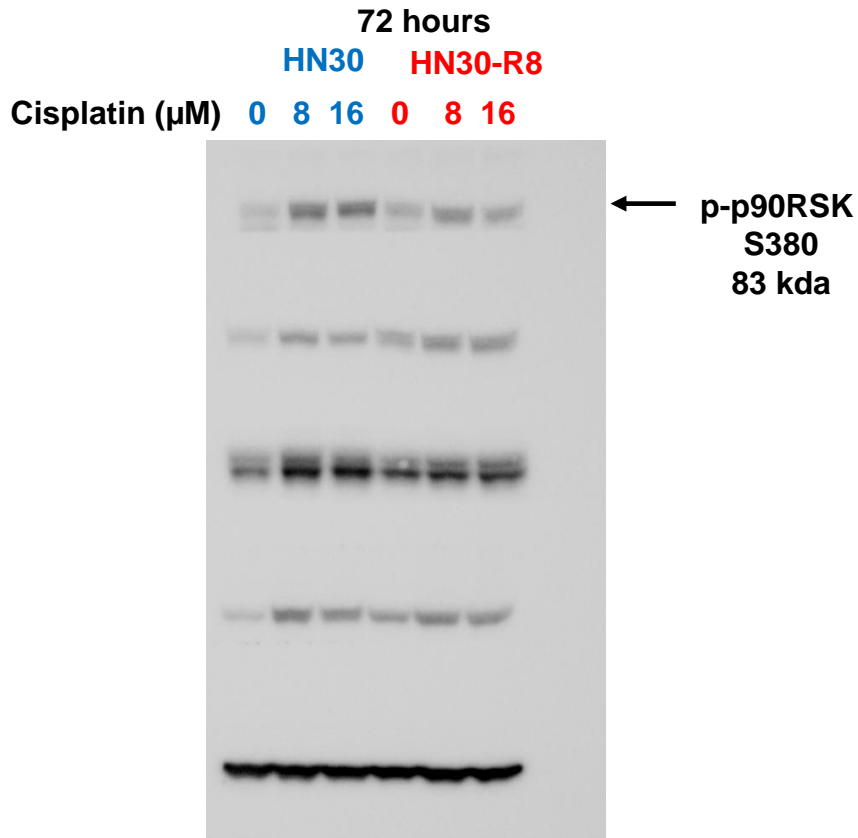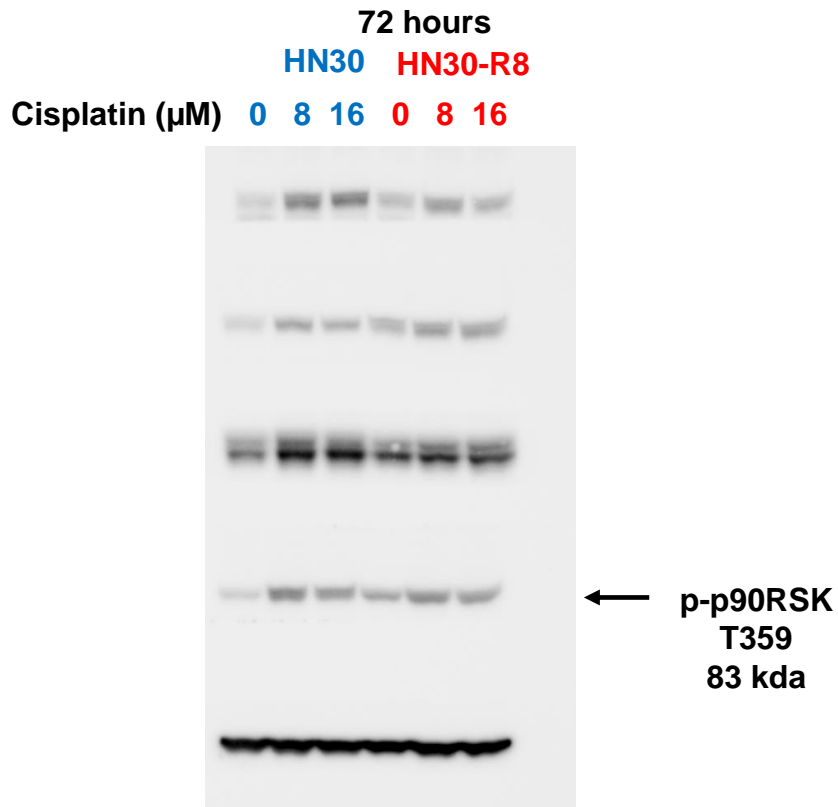

# Figure 2C Uncropped Western Blots

W118 $\Delta$   
p90RSK1.A  
p90RSK1.B  
p90RSK2  
p90RSK3  
p90RSK4

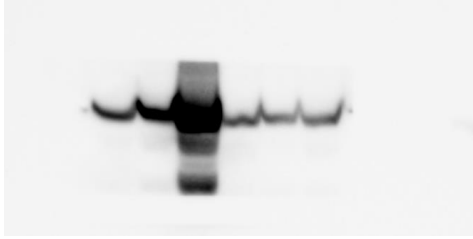

← p90RSK1  
83 kda

W118 $\Delta$   
p90RSK1.A  
p90RSK1.B  
p90RSK2  
p90RSK3  
p90RSK4

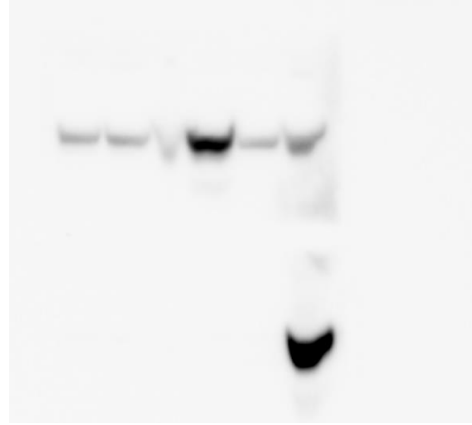

← p90RSK4  
83 kda

W118 $\Delta$   
p90RSK1.A  
p90RSK1.B  
p90RSK2  
p90RSK3  
p90RSK4

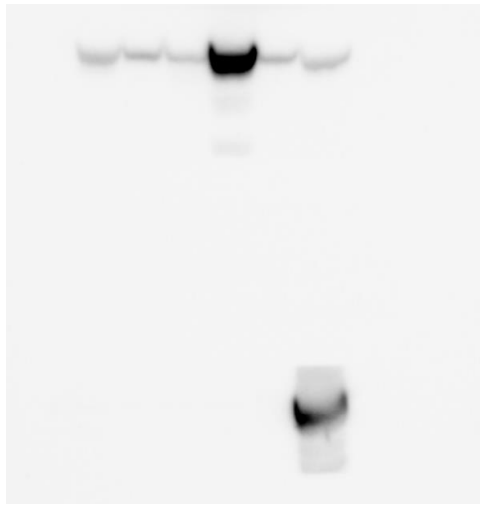

← p90RSK2  
83 kda

W118 $\Delta$   
p90RSK1.A  
p90RSK1.B  
p90RSK2  
p90RSK3  
p90RSK4

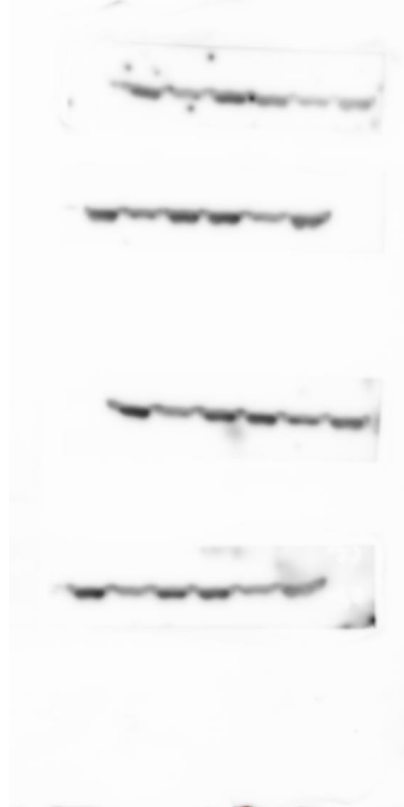

← GAPDH  
36 kda

W118 $\Delta$   
p90RSK1.A  
p90RSK1.B  
p90RSK2  
p90RSK3  
p90RSK4

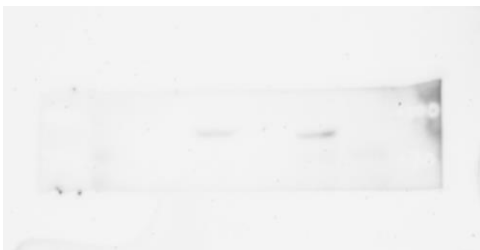

← p90RSK3  
83 kda

**Figure 4A Uncropped Western Blots**

Cal27  
HN5  
HN30  
HN31  
OSC19  
Te1  
Te6  
UMSCC1

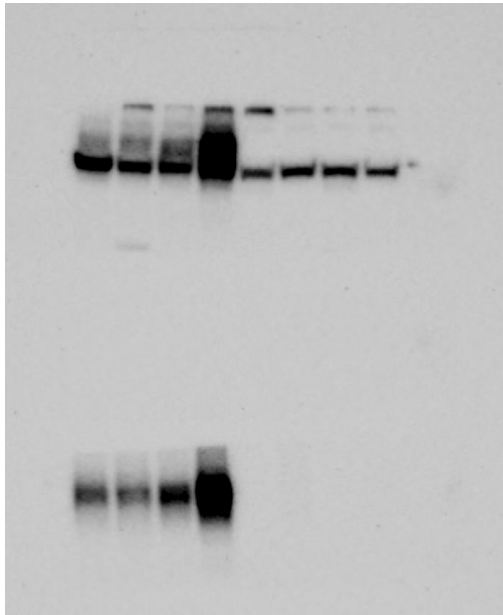

Cal27  
HN5  
HN30  
HN31  
OSC19  
Te1  
Te6  
UMSCC1

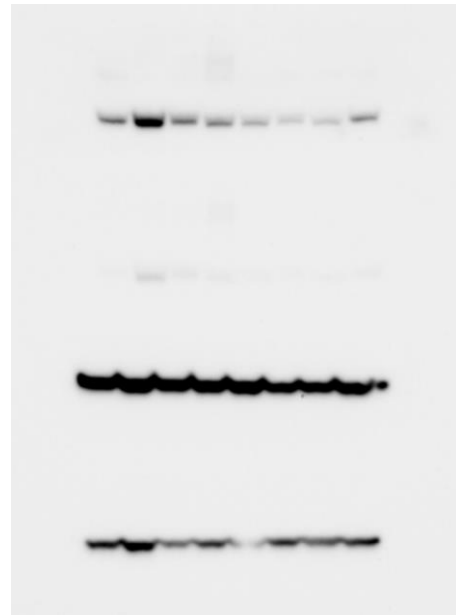

Cal27  
HN5  
HN30  
HN31  
OSC19  
Te1  
Te6  
UMSCC1

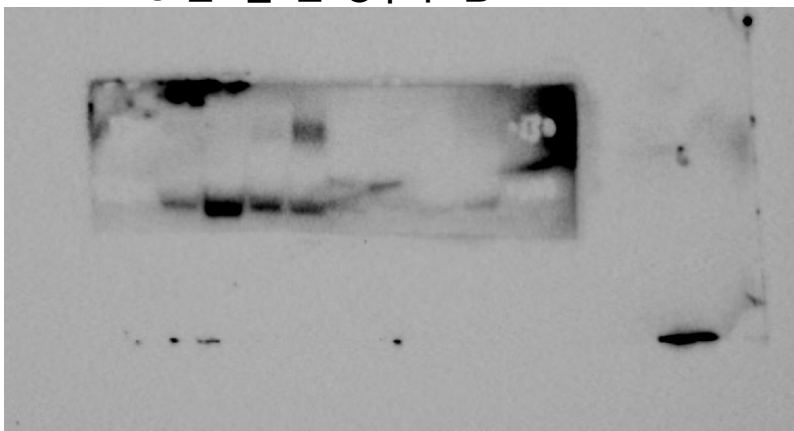

# Figure 4C Uncropped Western Blots

UMSCC1  
VC OE

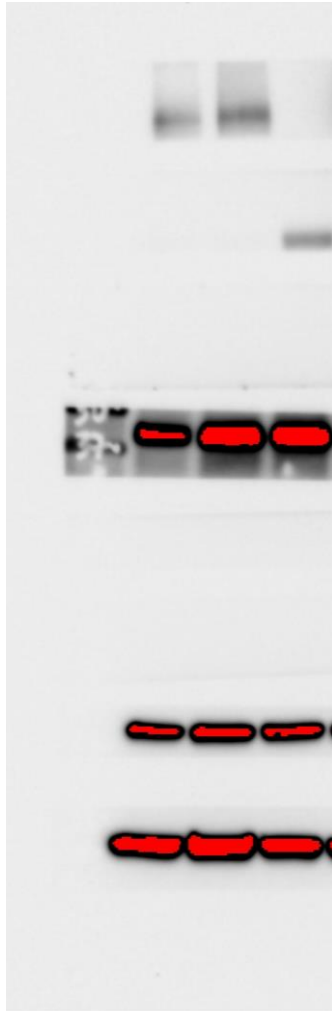

← TMEM16A  
120 kda

UMSCC1  
VC OE

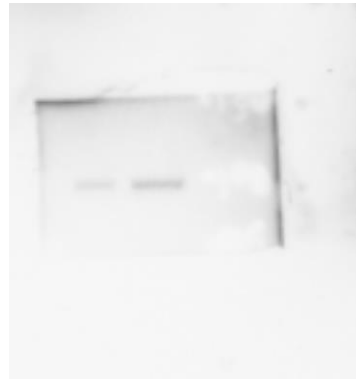

← p-p90RSK [T573]  
83 kda

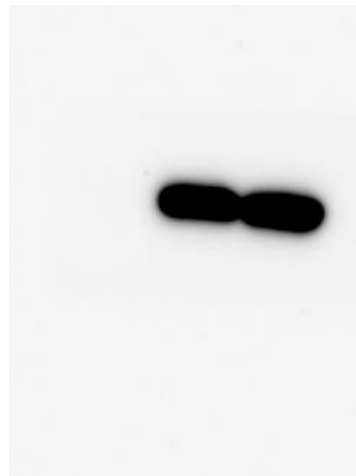

← Actin  
42 kda

# Figure 4C Uncropped Western Blots

HN30  
shTMEM16A NT

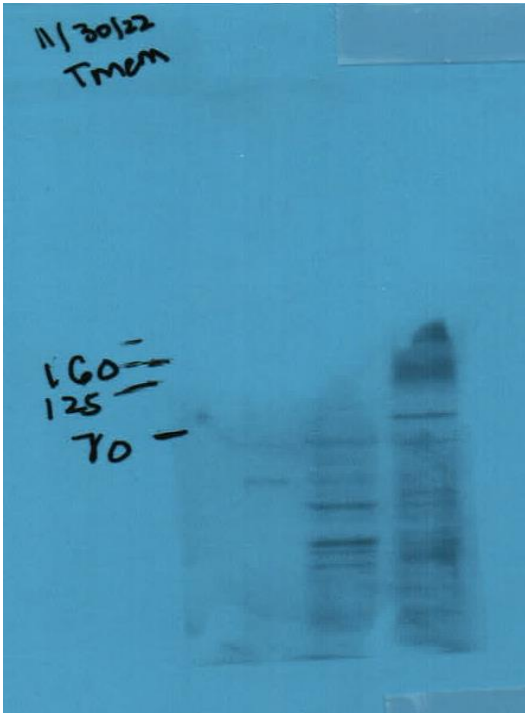

HN30  
NT shTMEM16A

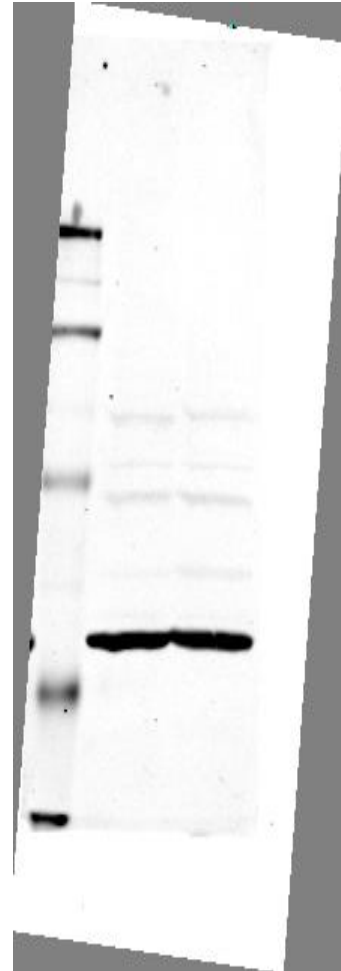

HN30  
NT shTMEM16A

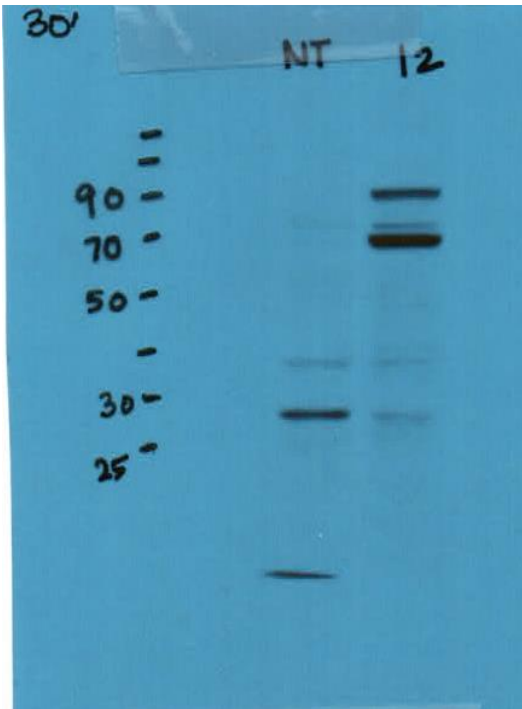

# Supplemental Figure 2A Uncropped Western Blots

HN30-R8

NT sh-p90RSK1

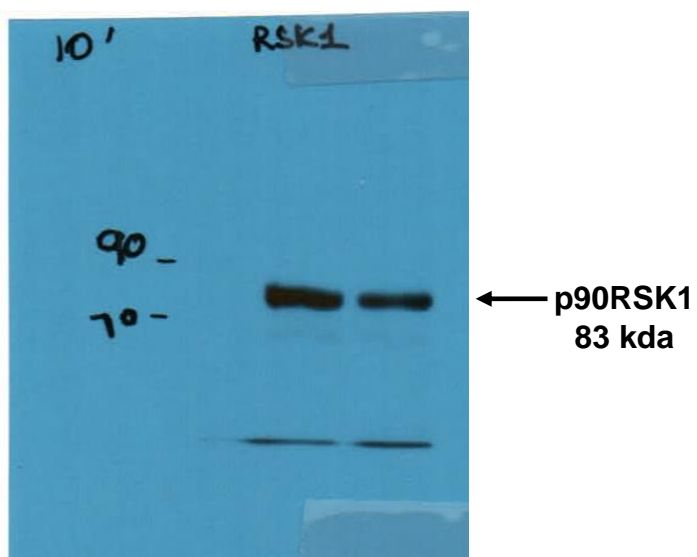

HN30-R8

NT sh-p90RSK2

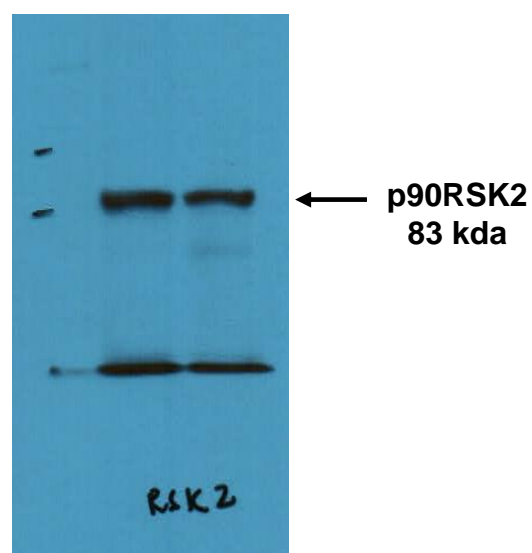

HN30-R8

NT sh-p90RSK1

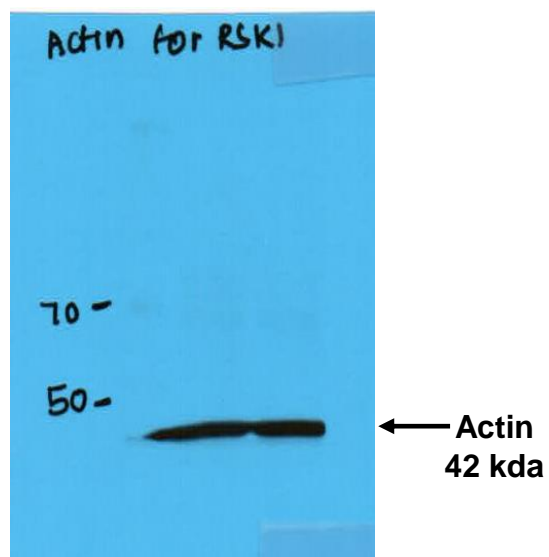

HN30-R8

NT sh-p90RSK2

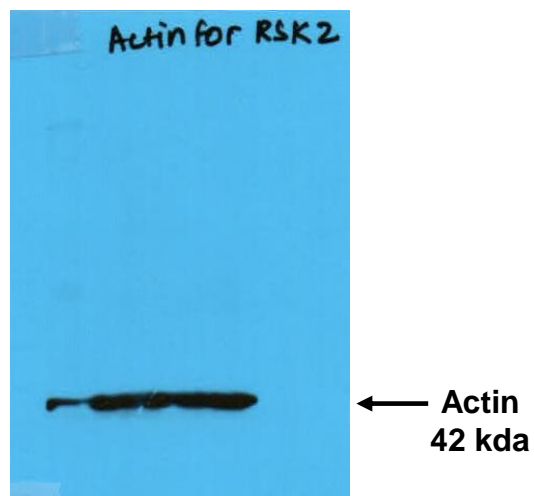

Supplement: 12885_2024_11892_MOESM3_ESM.pdf [file 12885_2024_11892_MOESM3_ESM.pdf]
