# Supplementary material for: p90RSK pathway inhibition synergizes with cisplatin in TMEM16A overexpressing head and neck cancer
Source: PubMed Central journal article supplement (PMC10875868; doi:10.1186/s12885-024-11892-9), 2024-02-19
Supplement: 12885_2024_11892_MOESM1_ESM.pdf [file 12885_2024_11892_MOESM1_ESM.pdf]

## Supplemental Table 1

| Cell line                    | Media                                                                | Source               |
|------------------------------|----------------------------------------------------------------------|----------------------|
| HN30, HN31                   | DMEM +10%FBS +P/S + 1mM Sodium Pyruvate, 1x MEM Vitamin, 1x MEM NEAA | Vlad Sandulache [16] |
| HN5                          | DMEM/F12 + 10%FBS + P/S                                              | ATCC                 |
| Cal27, Cal33, UMSCC1, UMSCC9 | DMEM +10%FBS +P/S                                                    | ATCC                 |
| OSC19                        | DMEM +10%FBS +P/S                                                    | JCRB                 |
| FaDu                         | EMEM +10%FBS +P/S                                                    | ATCC                 |
| Te1, Te6, Te9                | RPMI +10%FBS +P/S                                                    | Novartis             |

**Supplemental Table 1. Growth media and supplements used for indicated cell lines.**

## Supplemental Figure 1

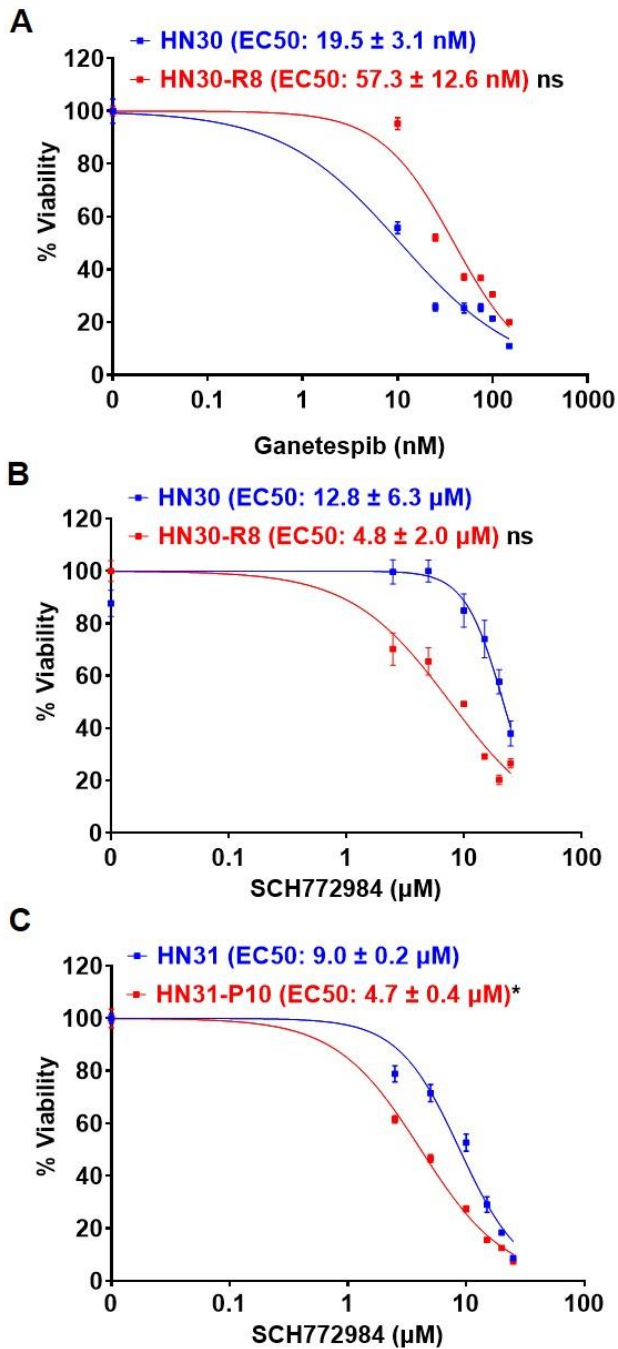

**Supplemental Figure 1. Cell viability curves for HSP90 and ERK1/2 inhibitors.**

Cell proliferation assay and average EC50 values for (A) ganetespib and (B and C) SCH772984 in indicated cell lines. Representative graphs from one experiment are shown. Statistical significance was calculated using Student's t-test. \*p < 0.05.

## Supplemental Figure 2

A

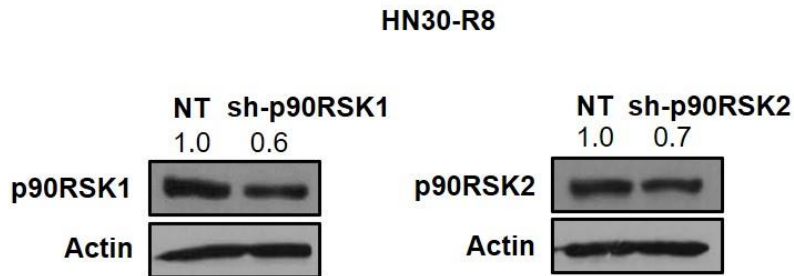

B

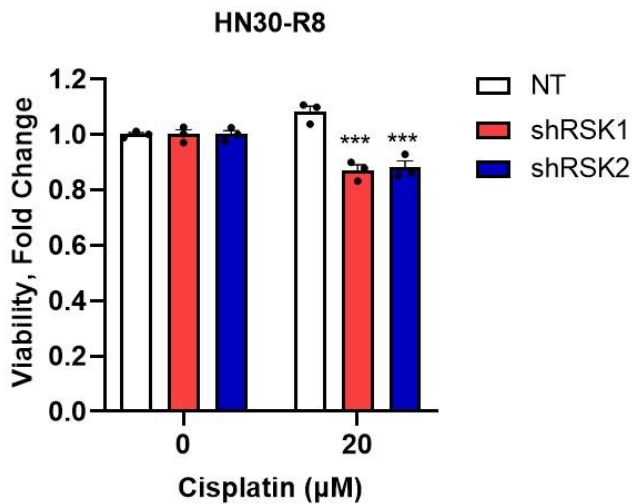

### Supplemental Figure 2. Viability of HN30-R8 cells with shRNA knockdown of p90RSK isoforms 1 and 2.

(A) Western blots of HN30-R8 cells with shRNA knockdown of p90RSK1 and p90RSK2. Fold changes of band intensities for respective protein are placed above the blot. (B) Viability of HN30-R8 cells with p90RSK isoform knockdown treated with 20  $\mu\text{M}$  of cisplatin. Comparisons are made between each p90RSK isoform to the non-target (NT). Statistical significance was calculated using two-way ANOVA with Tukey's multiple comparison test. \*\*\* $p < 0.0001$ .

### Supplemental Figure 3

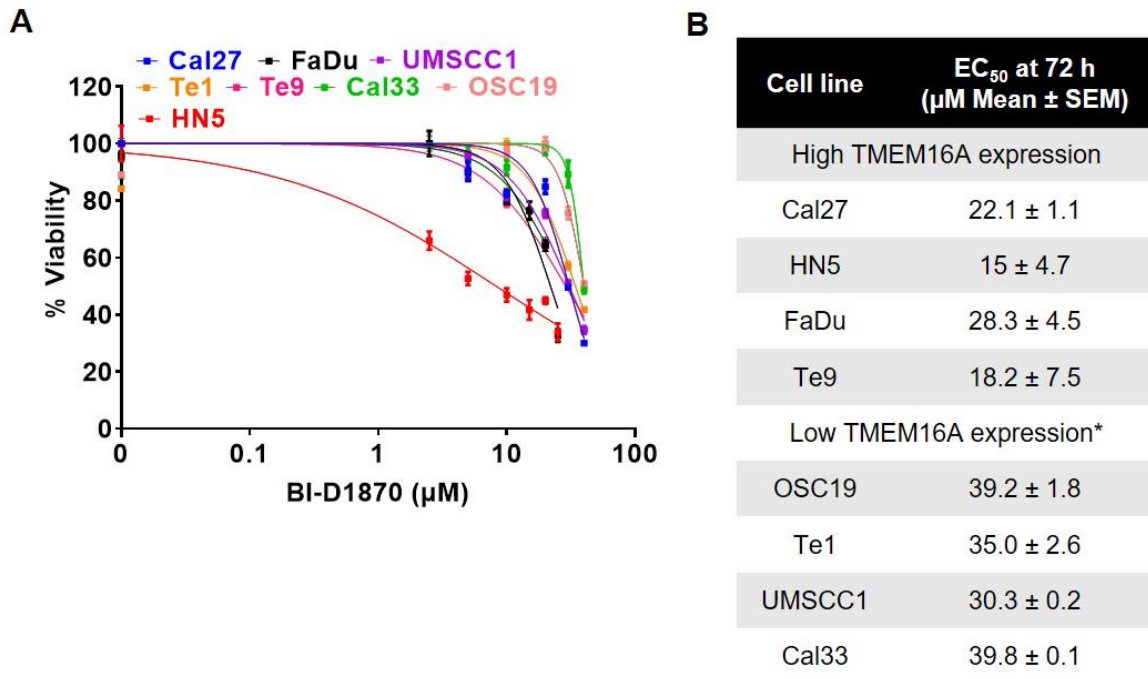

**Supplemental Figure 3. Cell viability curves in HNSCC for BI-D1870.**

(A) Cell proliferation assay for BI-D1870 in indicated cell lines. Representative graph from one experiment is shown. (B) Table indicating average EC<sub>50</sub> value. Statistical significance was calculated using Student's t-test. \*p < 0.05.

## Supplemental Figure 4

A

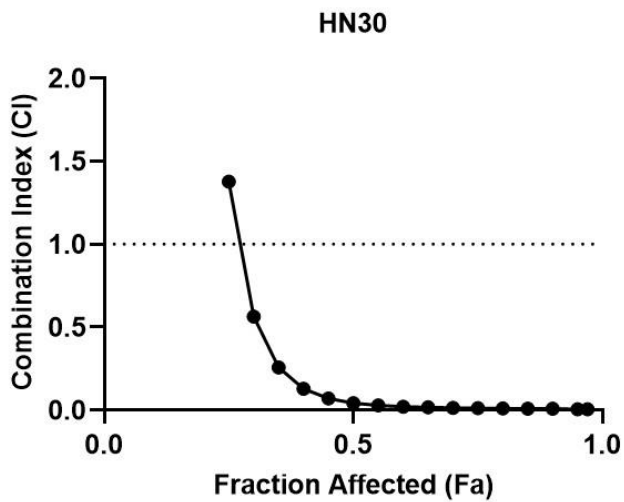

B

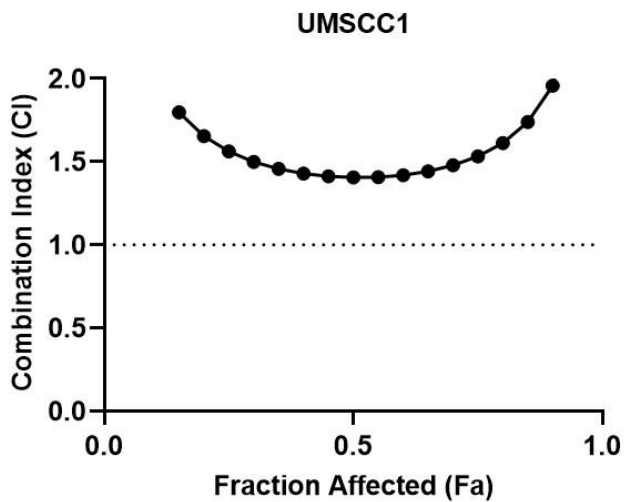

**Supplemental Figure 4. Combination Index synergy curves for cisplatin and BI-D1870 in TMEM16A-high and TMEM16A-low cells.**

Combination Index (CI) synergy curves for (A) HN30 (high TMEM16A expression) and (B) UMSCC1 (low TMEM16A expression) treated with cisplatin and BI-D1870. CI < 1.0 indicates synergy.
